# Supplementary material for: Miniature radiocarbon measurements ( &lt; 150 µg C) from sediments of Lake Żabińskie, Poland: effect of precision and dating density on age–depth models
Source: Copernicus journal article supplement (doi:10.5194/gchron-2-63-2020), 2020-04-17
Supplement: Supplementary file 1 [file gchron-2-63-2020-supplement.zip]

Archive with 5 entries (5 files):
- Supplemental File S3 - Simulated Age-depth models animation.gif
- Suplemental File S1 - Core Images and 14C samples.png
- Supplemental File S4 - Bacon vs OxCal test.pdf
- Supplemental File S2 - Microscope images of macrofossils.pdf
- gchron-2-63-2020-supplement-title-page.pdf
