# Supplementary material for: Miniature radiocarbon measurements ( &lt; 150 µg C) from sediments of Lake Żabińskie, Poland: effect of precision and dating density on age–depth models
Source: Copernicus journal article supplement (doi:10.5194/gchron-2-63-2020), 2020-04-17
Supplement: Supplementary file 1 [file gchron-2-63-2020-supplement.zip › gchron-2-63-2020-supplement-title-page.pdf]

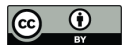

## *Supplement of*

# **Miniature radiocarbon measurements ( $< 150 \mu\text{g C}$ ) from sediments of Lake Żabińskie, Poland: effect of precision and dating density on age–depth models**

**Paul D. Zander et al.**

*Correspondence to:* Paul D. Zander ([paul.zander@giub.unibe.ch](mailto:paul.zander@giub.unibe.ch))

- [gchron-2-63-2020-supplement-title-page.pdf](#)
- [Supplemental File S1 - Core Images and  \$^{14}\text{C}\$  samples.png](#)
- [Supplemental File S2 - Microscope images of macrofossils.pdf](#)
- [Supplemental File S3 - Simulated Age-depth models animation.gif](#)
- [Supplemental File S4 - Bacon vs OxCal test.pdf](#)

The copyright of individual parts of the supplement might differ from the CC BY 4.0 License.
