# Supplementary figures and images for: Miniature radiocarbon measurements ( &lt; 150 µg C) from sediments of Lake Żabińskie, Poland: effect of precision and dating density on age–depth models
Source: Copernicus journal article supplement (doi:10.5194/gchron-2-63-2020), 2020-04-17

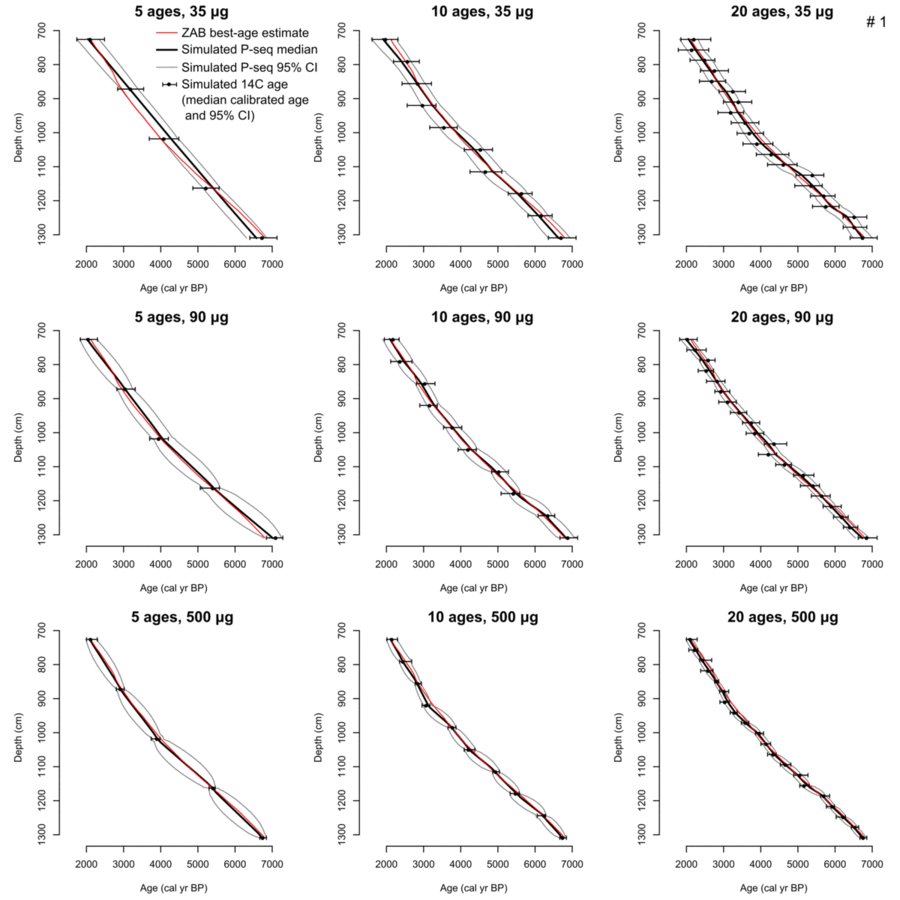

Supplement: Supplementary file 1 [file gchron-2-63-2020-supplement.zip › Supplemental File S3 - Simulated Age-depth models animation.gif]

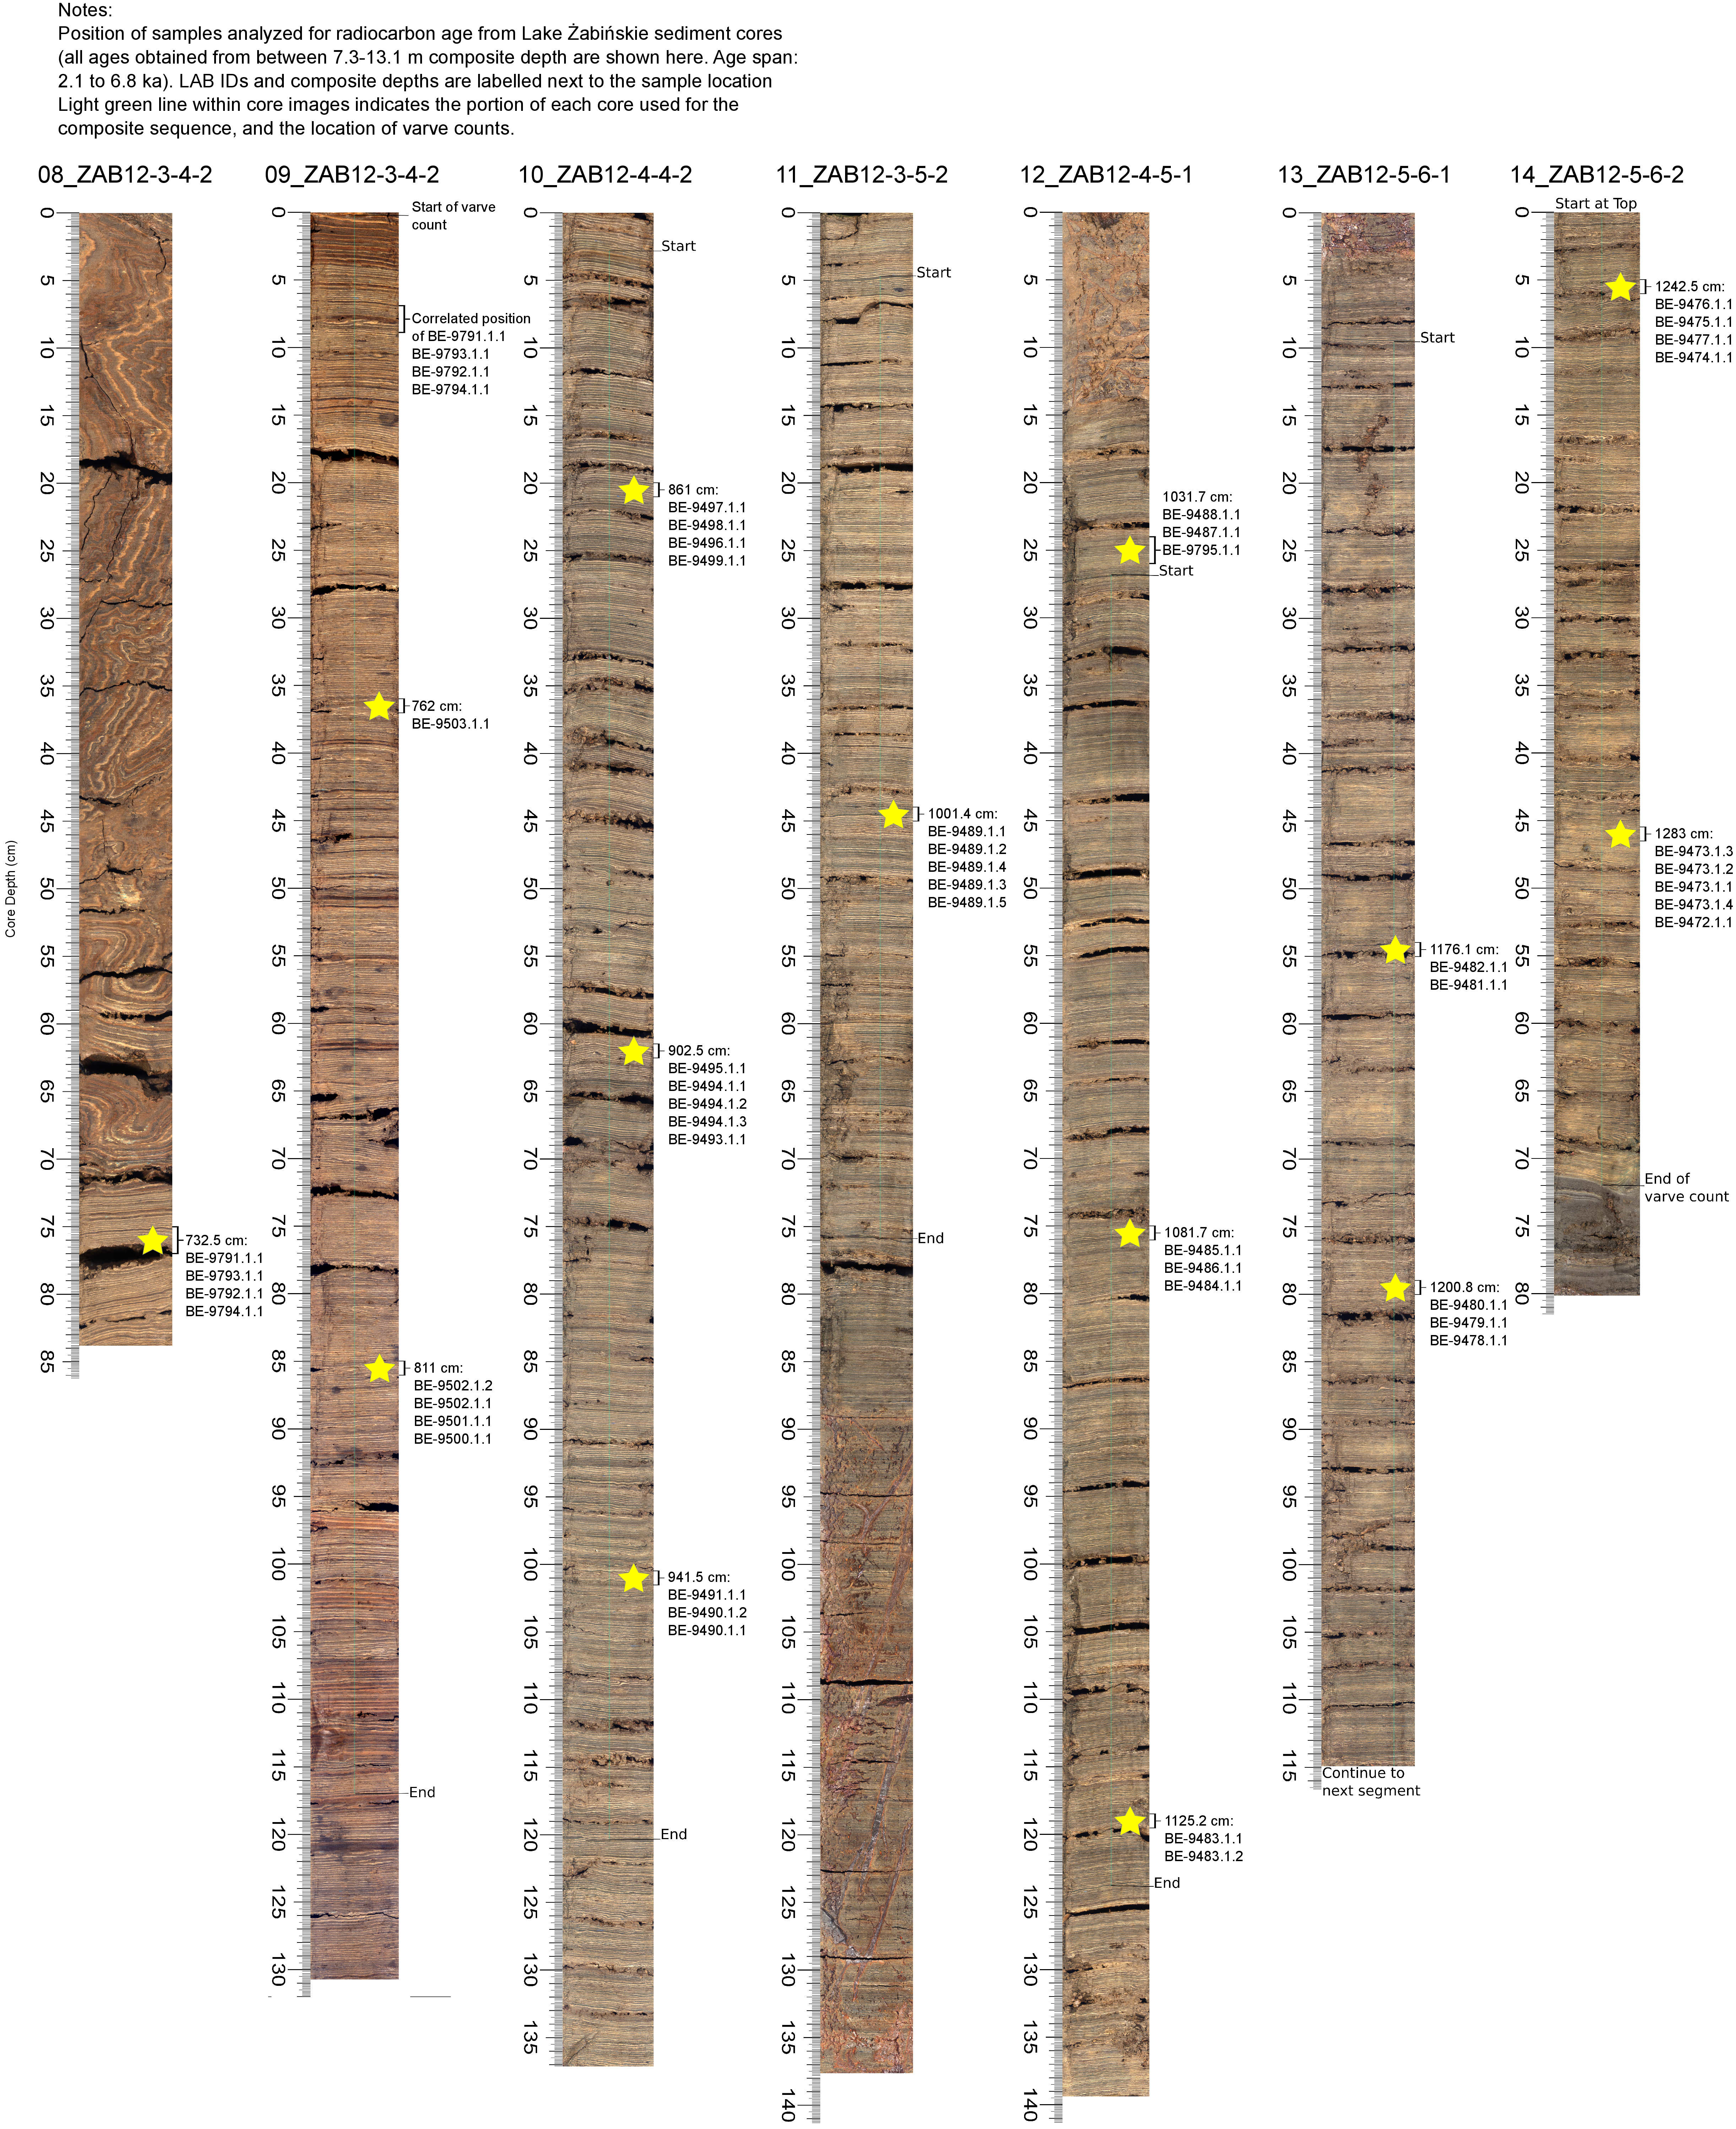

Supplement: Supplementary file 1 [file gchron-2-63-2020-supplement.zip › Suplemental File S1 - Core Images and 14C samples.png]
